# Supplementary material for: Trichoderma reesei fungal degradation boosted the potentiality of date pit extract in fighting scopolamine-induced neurotoxicity in male rats
Source: PubMed Central journal article supplement (PMC8295356; doi:10.1038/s41598-021-94058-y), 2021-07-21
Supplement: 41598_2021_94058_MOESM1_ESM.pdf [file 41598_2021_94058_MOESM1_ESM.pdf]

(A)

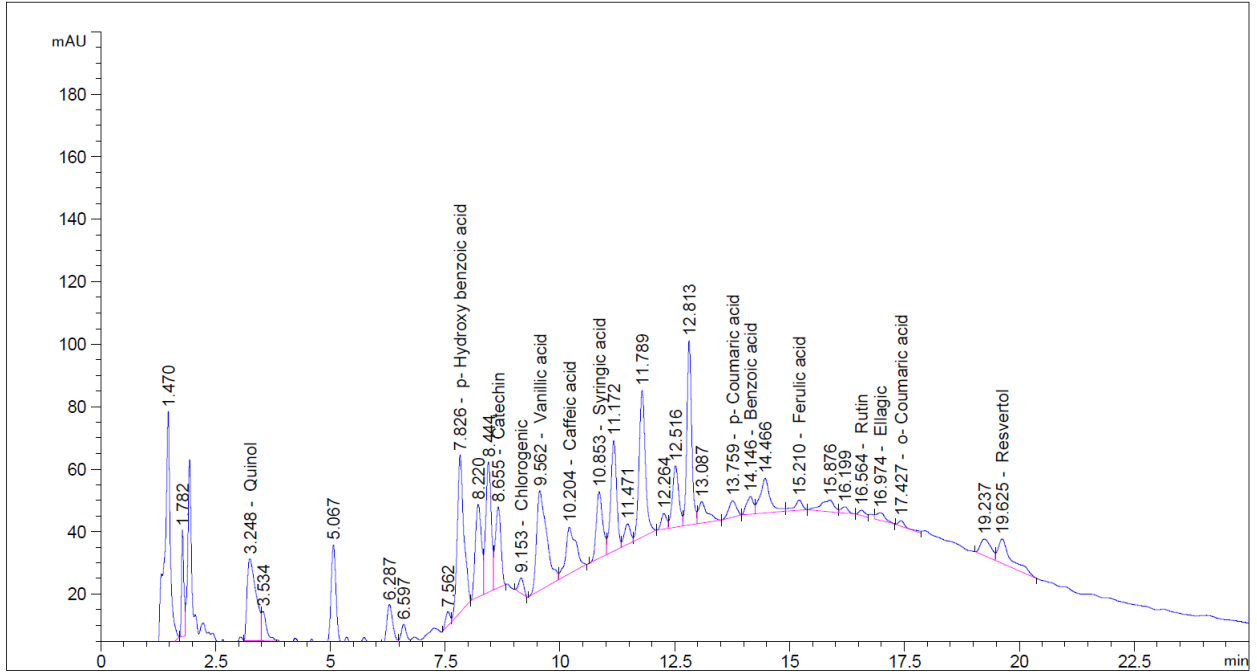

(B)

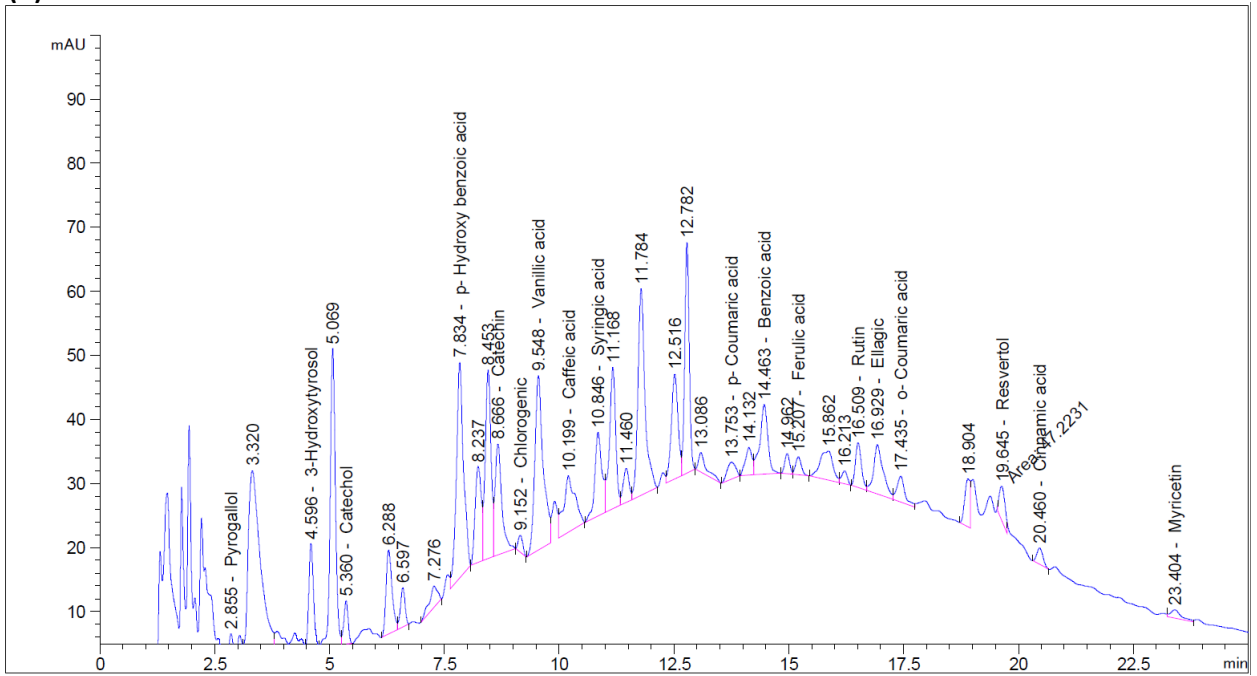

**Supplementary Fig. (1).** HPLC chromatograms of the phenolic compounds in ethanolic DP (A) and FDDP (B) extracts.

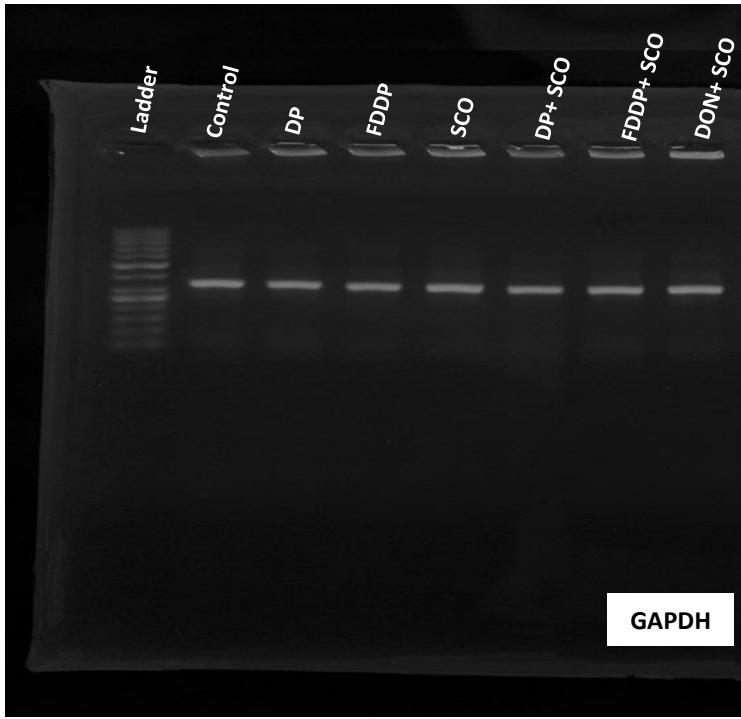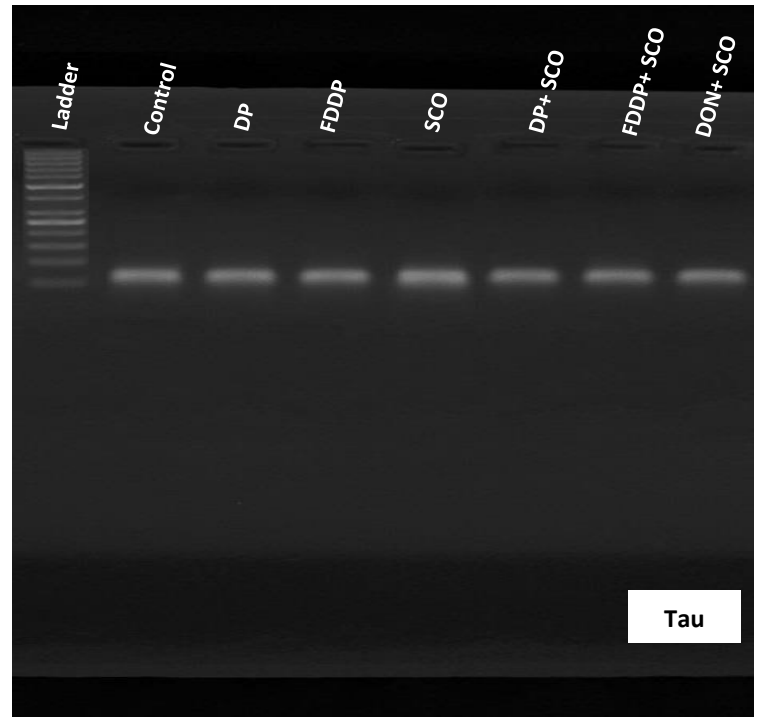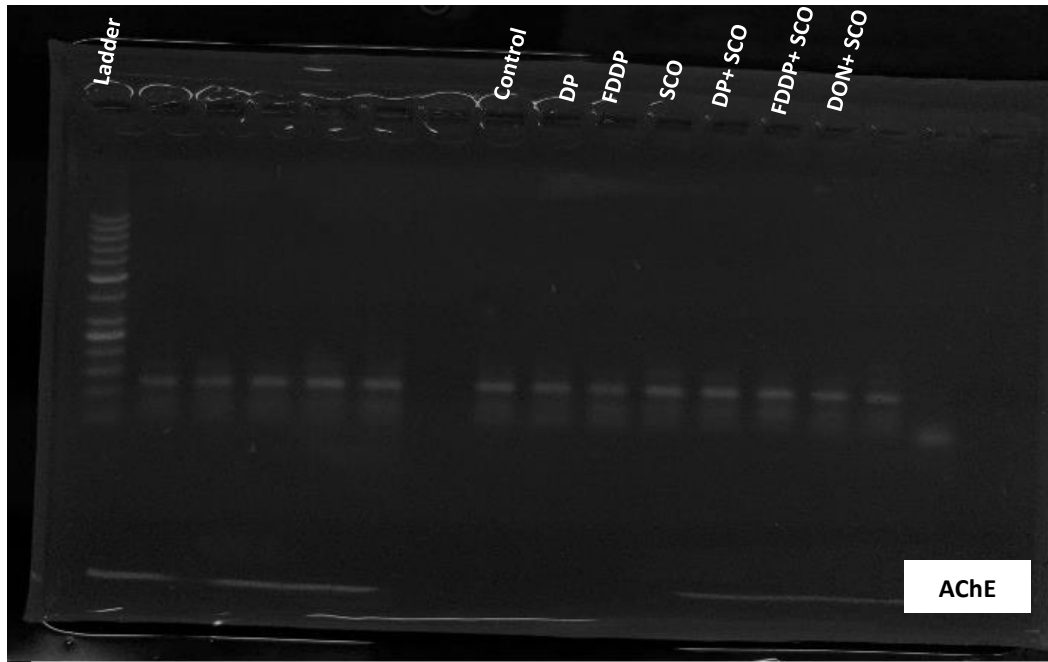

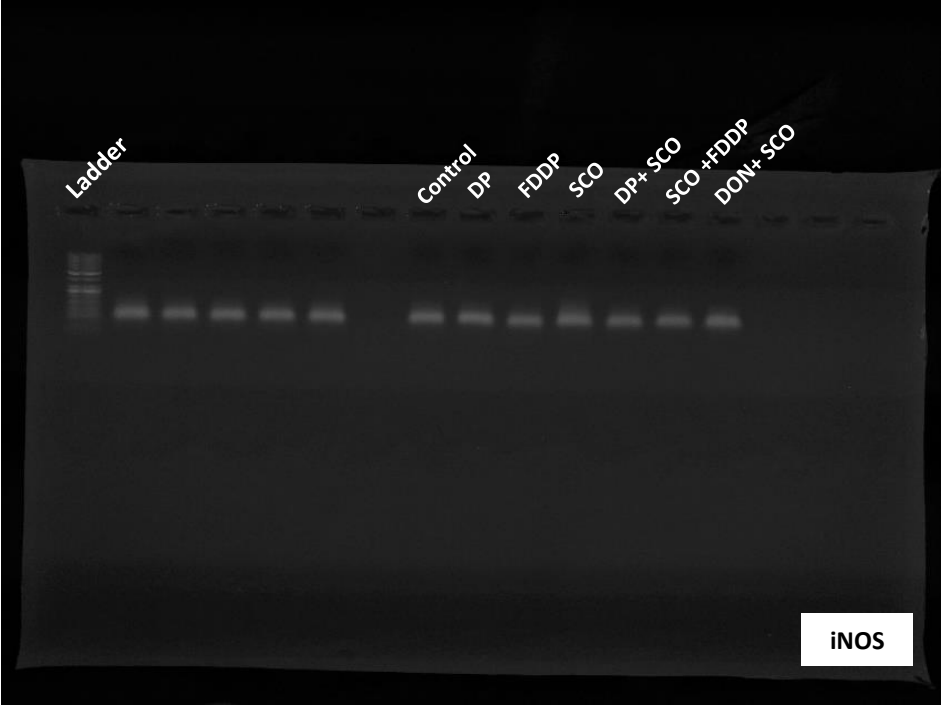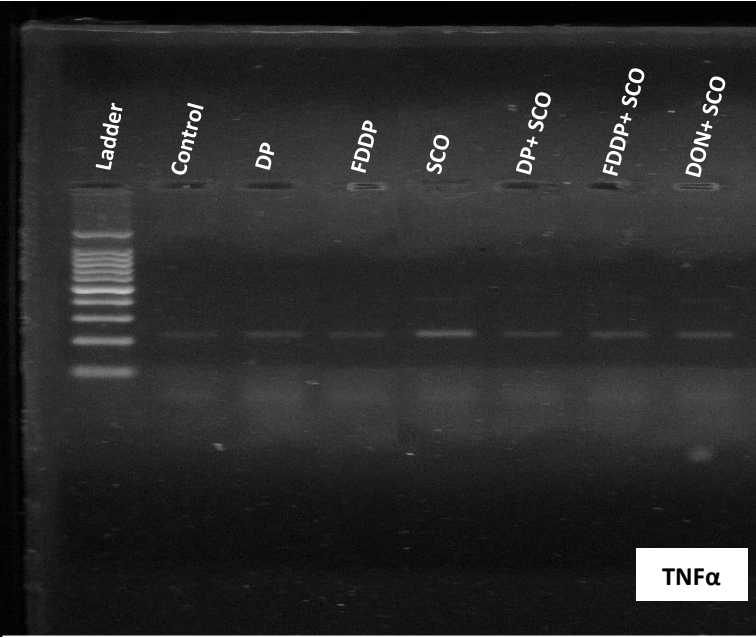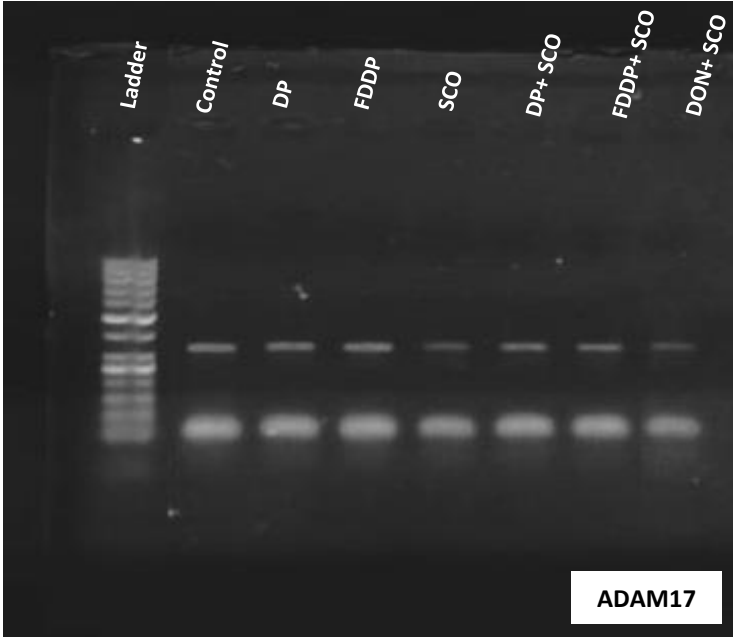

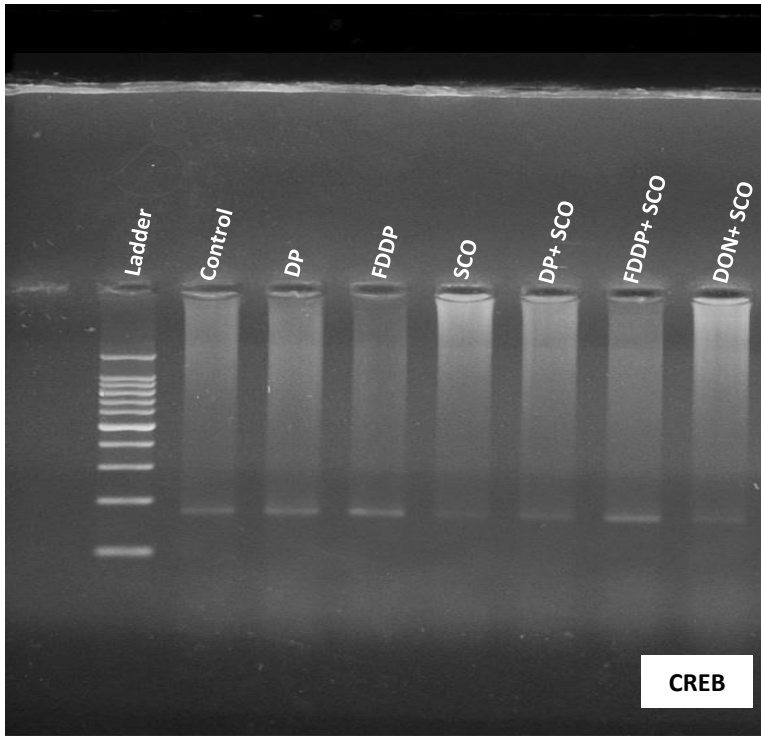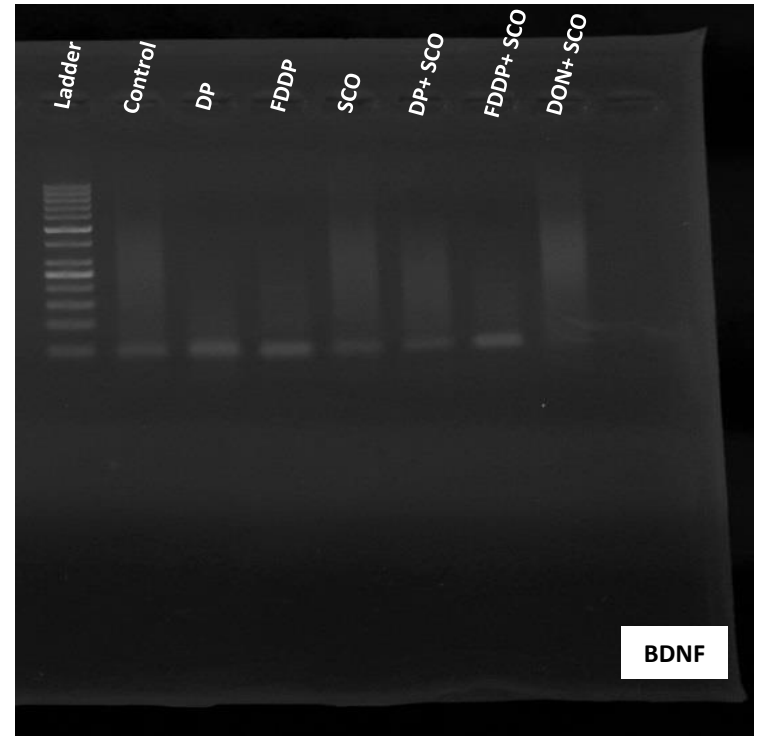

**Supplementary Fig. (2).** Agarose gel electrophoresis of PCR products of the tested genes. Lane 1: Control, Lane 2: DP, Lane 3: FDDP, Lane 4: SCO, Lane 5: DP+ SCO, Lane 6: FDDP+ SCO and Lane 7: DON+ SCO.
